# Supplementary material for: Pulmonary thromboembolism with computed tomography defined chronic thrombus is associated with higher mortality
Source: PubMed Central journal article supplement — Pulm Circ. 2020 May 1;10(2):2045894020905510. doi: 10.1177/2045894020905510 (PMC7222268; doi:10.1177/2045894020905510), 2020-05-01
Supplement: sj-pdf-1-pul-10.1177_2045894020905510.pdf [file sj-pdf-1-pul-10.1177_2045894020905510.pdf]

Supplemental Table 1. Baseline characteristics of patients with all-cause mortality

|                                 | Survival<br>(n=155) | All-cause mortality<br>(n=107) | p value |
|---------------------------------|---------------------|--------------------------------|---------|
| Age (years old)                 | 64 ± 16             | 67 ± 15                        | 0.13    |
| Sex (Male)                      | 91 (59%)            | 65 (61%)                       | 0.74    |
| BMI (kg/m <sup>2</sup> )        | 26.1 ± 5.3          | 23.3 ± 3.5                     | <0.01   |
| BMI < 18.5 (kg/m <sup>2</sup> ) | 5 (3%)              | 5 (5%)                         | 0.33    |
| Chronic thrombus                | 26 (17%)            | 32 (30%)                       | 0.01    |
| Clinical risk: High             | 7 (5%)              | 8 (8%)                         |         |
| Intermediate                    | 60 (39%)            | 34 (32%)                       | 0.37    |
| Low risk                        | 88 (57%)            | 65 (61%)                       |         |
| Deep vein thrombosis            | 39 (25%)            | 20 (19%)                       | 0.24    |
| Etiology: Cancer                | 37 (24%)            | 64 (60%)                       | <0.01   |
| APS and Autoimmune disease      | 4 (3%)              | 6 (6%)                         | 0.33    |
| Simplified PESI                 | 0.8 ± 0.8           | 1.5 ± 0.8                      | <0.001  |
| Anticoagulant: warfarin         | 112 (72%)           | 53 (50%)                       |         |
| NOAC                            | 19 (12%)            | 2 (2%)                         | <0.01   |
| Systolic blood pressure         | 133 ± 23            | 132 ± 21                       | 0.81    |
| Diastolic blood pressure        | 80 ± 14             | 80 ± 16                        | 0.88    |
| Heart rate                      | 93 ± 18             | 99 ± 20                        | 0.02    |
| Respiratory rate                | 21 ± 4              | 22 ± 6                         | 0.06    |
| Platelet (10 <sup>3</sup> /uL)  | 225 ± 118           | 230 ± 101                      | 0.43    |

Data are presented as the mean ± SD or N (%).

Abbreviations: APS: antiphospholipid syndrome; BMI: body mass index; NOAC: novel oral anticoagulant; PE: pulmonary embolism; PESI: pulmonary embolism severity index
